# Supplementary material for: Patient and doctor perspectives on HIV screening in the emergency department: A prospective cross-sectional study
Source: PLoS One. 2017 Jul 21;12(7):e0180389. doi: 10.1371/journal.pone.0180389 (PMC5521743; doi:10.1371/journal.pone.0180389)
Supplement: S1 Table — (XLSX) [file pone.0180389.s003.xlsx]

## Sheet: Qpatient
N°	Study investigator	Age	1.3	1.3 additional info	1.4	1.5	1.7	1.72	1.8	3.1	3.2	3.3	3.4	3.5	3.6	3.7	3.8a	3.8b	3.8c	3.8d	3.9a	3.9b	3.9c	3.9d	3.9e	3.9f	3.10a	3.10b	3.10c	3.10d	3.10e	3.10f	4.1	4.2	4.3	4.4a	4.4b	4.4c	4.4d1	4.4d2	4.4d3	4.4d4	4.4d5	4.4d6	4.4e	4.5	4.6	5.1	5.2
1	1	34.789	1		0	2	unknown	unknown	1	abdominal pain	1	0.5	0	0	0	0	0	0	0	0	1	1	0	0	1	0	0	0	0	0	0	0	1	2	3	2	0	0	0	0	0	0	0	0	1	1	0	0	2
2	1	26.7562	0		1	1	unknown	unknown	1	abdominal pain	1	366	0	0	0	0	0	0	0	0	1	0	0	0	0	0	0	0	0	0	0	0	1	4	1	2	0	1	0	0	1	0	0	0	1	0	0	0	2
3	1	27.2219	0		0	1	unknown	unknown	1	back pain	1	29	0	0	0	0	0	0	0	0	0	1	0	0	1	0	0	0	0	0	0	0	2	4	1	2	0	1	0	0	0	0	0	0	1	0	0	1	0
4	1	53.6082	0		0	1	unknown	unknown	1	confusion	1	28	0	1	0	0	0	0	0	0	1	1	0	0	0	0	0	0	0	0	0	0	2	4	1	2	0	1	1	0	1	1	0	0	1	1	0	0	2
5	1	25.7178	2		0	1	drépanocytose	drépanocytose	2	sickle cell crisis	1	366	1	0	0	0	0	0	0	0	1	0	0	0	0	0	0	0	0	0	0	0	2	4	8	2	0	1	0	0	0	0	0	0	1	0	0	1	0
6	1	31.5945	1		0	1	état fébril (lymphome)	EF (lymphome)	0	fever	1	27	0	0	0	0	0	0	0	0	0	0	0	0	1	0	0	0	0	0	0	0	2	1	8	2	0	0	0	0	0	0	0	0	1	1	0	0	1
7	1	43.6603	1		0	1	bronchite asthmatique	bronchite asthmatique	0	asthma	1	28	1	0	0	1	0	0	0	1	0	0	0	0	0	0	0	1	0	0	0	1	2	3	8	0	0	0	1	0	0	1	1	1	2	1	0	1	0
8	1	54.9562	0	5	1	0	# cheville	# cheville	1	twisted ankle	1	27	1	0	0	1	0	0	1	0	0	0	0	0	0	0	0	0	0	0	0	1	2	4	2	2	0	0	0	0	0	0	0	0	1	0	0	1	0
9	1	41.4493	1		0	0	unknown	unknown	1	fall	1	7	0	0	0	0	0	0	0	0	1	0	0	0	0	0	0	0	0	0	0	0	0	0	0	0	0	0	0	0	0	0	1	0	3	0	0	0	4
10	1	29.2904	0		0	1	entorse cheville	entorse cheville	1	twisted ankle	1	27	1	0	0	0	0	0	0	0	1	0	0	0	0	0	0	0	0	0	0	0	1	4	8	0	0	0	0	0	0	0	0	0	2	0	0	0	1
11	1	57.8082	0		0	0	unknown	unknown	1	road traffic accident	1	1	1	0	0	1	0	0	1	0	0	0	0	0	0	0	0	0	0	0	0	1	1	4	8	2	0	1	0	0	0	0	0	0	1	0	1	0	4
12	2	61.3589	0	3	0	0	unknown	unknown	1	headache	1	29	0	0	0	0	0	0	0	0	1	1	0	0	0	0	0	0	0	0	0	0	0	0	0	2	0	0	0	0	0	0	0	0	2	0	0	1	0
13	1	61.7726	1		0	2	diverticulite	diverticulite	1	diverticulitis	1	27	1	0	0	0	0	0	0	0	1	0	0	0	0	0	0	0	0	0	0	0	1	4	8	2	0	0	0	0	0	0	0	0	1	0	0	0	2
14	2	50.9945	0		0	0	# cheville	# cheville	1	# ankle	1	29	1	0	0	0	0	0	0	0	0	1	0	0	0	0	0	0	0	0	0	0	0	0	0	0	0	0	0	0	0	0	0	0	0	0	0	0	4
15	2	39.8082	1		1	0	unknown	unknown	1	abdominal pain	0	1	0	0	0	0	0	0	0	0	1	1	0	0	0	0	0	0	0	0	0	0	1	4	2	2	0	0	0	0	0	0	0	0	1	0	0	1	0
16	1	26.3726	1		1	1	unknown	unknown	1	hemiparesis	0	0	0	1	1	0	0	0	0	0	1	1	0	0	0	0	0	0	0	0	0	0	0	0	0	2	0	0	0	0	0	1	0	0	2	0	0	1	0
17	1	67.0274	0		1	0	cholangite	cholangite	1	cholangitis	1	1	0	0	0	0	0	0	0	0	1	1	0	0	0	0	0	0	0	0	0	0	0	0	0	2	0	0	0	0	0	0	0	0	0	1	0	1	0
18	1	60.0055	5		0	0	crise asthme	crise asthme	1	asthma	1	7	1	0	0	0	0	0	0	0	1	0	0	0	0	0	0	0	0	0	0	0	0	0	0	2	0	1	0	0	0	0	0	0	0	0	0	0	2
19	1	53.9014	0		0	2	unknown	unknown	1	inguinal hernia	1	0.5	0	1	0	0	0	0	0	0	1	1	0	0	0	0	0	0	0	0	0	0	2	4	8	2	0	0	0	0	0	1	0	1	1	0	0	1	0
20	1	32.1945	1		1	0	unknown	unknown	1	flu-like symptoms	1	8	0	0	0	0	0	0	0	0	0	1	0	0	0	0	0	0	0	0	0	0	0	0	0	2	0	0	0	0	0	0	0	0	1	0	0	0	4
21	1	38.7342	0		1	0	unknown	unknown	1	abdominal pain	1	365	0	0	0	0	0	0	0	0	1	0	0	0	0	0	0	0	0	0	0	0	2	4	2	2	0	0	0	0	0	0	0	0	1	0	0	0	2
22	1	37.5315	0		1	1	unknown	unknown	1	road traffic accident	1	366	0	0	0	0	0	0	0	0	1	1	0	0	1	0	0	0	0	0	0	0	2	2	2	2	0	1	0	0	0	0	0	0	1	0	0	0	1
23	1	29.389	1		0	1	unknown	unknown	1	renal colic	1	29	0	0	0	1	0	0	1	0	0	0	0	0	0	0	0	1	0	0	0	0	1	3	1	2	2	1	0	0	0	0	1	0	3	0	0	1	0
24	1	68.3452	0		0	1	unknown	unknown	1	abdominal pain	1	8	0	0	0	0	0	0	0	0	0	0	0	0	1	0	0	0	0	0	0	0	2	2	5	2	0	1	0	0	0	0	0	0	1	0	0	0	2
25	1	63.0986	0	1	0	3	traumatisme d'un membre	unknown	1	fall	1	28	1	0	0	0	0	0	0	0	1	0	0	0	0	1	0	0	0	0	0	0	1	4	3	2	0	1	0	0	0	0	0	0	1	0	0	0	2
26	1	31.9096	0		1	1	traumatisme d'un membre	unknown	1	fall	0	0	0	0	0	0	0	0	0	0	0	1	0	0	0	0	0	0	0	0	0	0	1	4	5	0	0	0	0	0	0	0	0	0	1	0	0	1	0
27	1	32.8055	1		1	1	traumatisme d'un membre	unknown	1	fall	0	0	0	0	0	0	0	0	0	0	1	0	1	0	0	0	0	0	0	0	0	0	1	4	4	0	0	0	0	0	0	0	0	0	1	0	0	1	0
28	2	63.6822	0		0	0	fracture péronné	unknown	1	fall	1	29	1	0	0	0	0	0	0	0	1	1	0	0	1	0	0	0	0	0	0	0	2	3	8	2	0	1	0	0	0	0	0	0	1	0	0	0	2
29	2	28.9315	5		0	1	unknown	unknown	1	fall	0	0	0	0	0	0	0	0	0	0	1	0	1	0	0	1	0	0	0	0	0	0	0	0	0	0	0	0	0	0	0	0	0	0	0	0	0	0	5
30	2	56.2877	3		1	0	unknown	unknown	1	diarrhoea	1	8	0	0	0	1	1	1	1	0	0	0	0	0	0	0	0	1	0	0	0	0	1	1	2	2	0	0	0	0	1	0	0	0	1	0	0	1	0
31	1	50.3918	1		0	0	unknown	unknown	1	flu-like symptoms	1	29	0	1	1	1	1	0	1	1	0	0	0	0	0	0	0	0	0	0	0	0	2	4	1	2	2	1	1	0	0	1	1	1	2	0	0	1	0
32	1	38.1616	1	1	1	1	unknown	unknown	1	fall	0	0	0	0	0	0	0	0	0	0	1	0	0	0	0	0	0	0	0	0	0	0	2	4	5	2	0	0	0	0	0	0	0	0	1	0	0	0	2
33	1	19.0932	2		0	1	unknown		1	trauma	1	28	0	0	0	1	0	0	1	0	0	0	0	0	0	0	0	1	0	0	0	0	1	4	3	0	0	0	0	0	0	0	0	0	2	1	0	1	0
34	2	22.8767	0		1	1	unknown	unknown	1	blood in stool	1	29	0	0	0	1	1	0	1	0	0	0	0	0	0	0	0	0	0	0	0	1	2	4	1	2	0	1	0	0	0	0	0	0	2	0	0	1	0
35	2	69.1589	0		1	0	unknown	unknown	1	blood in stool	1	29	0	0	0	0	0	0	0	0	1	0	1	0	0	0	0	0	0	0	0	0	0	0	0	0	0	0	0	0	0	0	0	0	1	0	0	0	2
36	2	19.5151	0		0	1	unknown	unknown	1	trauma	1	366	0	0	0	0	0	0	0	0	1	1	0	0	1	0	0	0	0	0	0	0	1	1	8	0	0	0	0	0	0	0	0	0	0	0	0	0	1
37	2	35.5671	0		1	1	unknown	unknown	1	fall	1	29	0	0	0	0	0	0	0	0	1	1	1	0	0	0	0	0	0	0	0	0	1	4	3	0	0	0	0	0	0	0	0	0	1	0	0	1	0
38	2	32.4411	0		1	0	unknown	unknown	1	renal colic	1	366	0	0	0	0	0	0	0	0	1	1	0	0	0	0	0	0	0	0	0	0	1	4	1	2	0	1	0	0	0	0	0	0	1	0	0	1	0
39	2	65.2	0		1	3	# cheville	# cheville	1	# ankle	1	29	1	0	0	0	0	0	0	0	1	1	1	0	0	0	0	0	0	0	0	0	0	0	0	0	0	0	0	0	0	0	0	0	0	0	0	0	2
40	2	51.863	1		0	0	unknown	unknown	1	trauma	0	0	0	0	0	0	0	0	0	0	1	1	0	0	0	0	0	0	0	0	0	0	1	4	1	1	0	0	0	0	0	0	0	0	1	0	0	1	0
41	2	20.3479	5		0	1	unknown	unknown	1	abdominal pain	0	0	1	0	0	0	0	0	0	0	1	1	0	0	0	0	0	0	0	0	0	0	2	2	1	2	2	0	0	0	0	0	0	0	3	0	0	1	0
42	2	25.7397	1		1	1	unknown	unknown	1	back pain	0	0	0	0	0	0	0	0	0	0	1	1	0	0	0	0	0	0	0	0	0	0	1	4	8	2	0	1	0	0	0	0	0	0	1	0	0	0	1
43	2	35.1507	3		0	1	pyélonéphrite	pyélonéphrite	1	pyelonephritis	0	0	1	0	0	0	0	0	0	0	1	0	0	0	0	0	0	0	0	0	0	0	2	3	8	0	0	0	0	0	0	0	0	0	1	1	0	1	0
44	2	35.5233	0		0	0	pneumonie	pneumonie	0	pneumonia	1	0.5	1	0	0	0	0	0	0	0	1	1	0	0	0	0	0	0	0	0	0	0	1	4	1	2	0	1	0	0	0	0	0	0	1	0	0	1	0
45	2	36.1123	0		1	1	unknown	unknown	1	abdominal pain	1	365	0	0	0	0	0	0	0	0	1	1	0	0	1	0	0	0	0	0	0	0	2	2	2	2	0	1	0	0	0	1	0	0	1	0	0	0	1
46	2	58.9534	0		0	0	unknown	unknown	1	trauma	1	29	0	0	0	0	0	0	0	0	1	1	0	0	0	0	0	0	0	0	0	0	0	0	0	0	0	0	0	0	0	0	0	0	1	0	0	0	4
47	2	26.3178	0		1	1	unknown	unknown	1	fall	0	0	0	0	0	0	0	0	0	0	1	1	0	0	0	0	0	0	0	0	0	0	0	0	0	2	0	0	0	0	0	0	0	0	1	0	0	1	0
48	2	64.3151	0		0	2	unknown	unknown	1	chest pain	1	4	0	0	0	0	0	0	0	0	1	1	0	0	0	0	0	0	0	0	0	0	1	4	8	2	0	0	0	0	0	0	0	0	2	0	0	1	0
49	2	23.3233	0	5	0	1	grippe	grippe	0	flu-like symptoms	1	366	1	0	0	0	0	0	0	0	1	1	0	0	0	0	0	0	0	0	0	0	0	0	0	0	0	0	0	0	0	0	0	0	0	0	0	0	2
50	2	24.537	0		0	1	unknown	unknown	1	trauma	0	0	0	0	0	0	0	0	0	0	0	1	0	0	0	0	0	0	0	0	0	0	0	0	0	2	0	0	0	0	0	0	0	0	1	0	0	1	0
51	2	19.811	2		1	1	unknown	unknown	1	abdominal pain	1	7	0	0	0	0	0	0	0	0	1	1	0	0	0	0	0	0	0	0	0	0	0	0	0	2	0	1	0	0	0	0	0	1	1	0	0	0	4
52	2	51.9781	0		0	0	unknown	unknown	1	diabetic foot	1	28	0	0	0	0	0	0	0	0	0	1	0	0	0	1	0	0	0	0	0	0	1	4	1	2	0	1	0	0	0	0	0	0	1	0	0	1	0
53	2	43.5753	1		0	0	unknown	unknown	1	fall	1	365	0	0	0	0	0	0	0	0	1	0	0	0	0	0	0	0	0	0	0	0	1	4	1	2	0	1	0	0	0	0	0	0	1	0	0	0	2
54	2	20.4247	0	1	1	1	unknown	unknown	1	fall	1	29	0	0	0	0	0	0	0	0	1	1	1	0	0	0	0	0	0	0	0	0	0	0	0	0	0	0	0	0	0	0	0	0	0	0	0	0	2
55	2	22.3836	0		0	1	unknown	unknown	1	abdominal pain	1	29	0	0	0	0	0	0	0	0	1	1	0	0	0	0	0	0	0	0	0	0	0	0	0	2	0	0	0	0	0	0	0	0	1	0	0	1	0
56	1	27.6356	0		1	0	pyélonéphrite	pyélonéphrite	1	renal colic	1	1	1	0	0	0	0	0	0	0	1	0	0	0	1	0	0	0	0	0	0	0	2	2	8	2	0	1	0	1	0	0	0	0	1	0	0	0	1
57	2	60.4192	0		0	0	infection hémorroïde	infection hémorroïde	1	infected pile	1	7	1	0	0	0	0	0	0	0	1	0	0	0	0	0	0	0	0	0	0	0	0	0	0	2	0	0	0	0	0	0	0	0	1	0	0	0	2
58	1	41.9507	1		0	0	gastroentérite	gastroentérite	1	epigastric pain	0	0	1	0	0	1	0	1	1	0	0	0	0	0	0	0	0	0	0	0	0	1	0	0	0	2	0	0	0	0	0	0	0	0	1	0	0	1	0
59	1	31.3068	0		0	1	appendicite	appendicite	1	abdominal pain	1	29	1	0	0	0	0	0	0	0	1	0	0	0	1	0	0	0	0	0	0	0	2	2	1	2	0	1	0	0	0	0	0	0	1	0	0	0	1
60	2	30	1		0	1	unknown	unknown	1	chest pain	1	365	0	0	0	0	0	0	0	0	1	1	0	0	1	0	0	0	0	0	0	0	1	3	3	0	0	0	0	0	0	1	0	0	2	0	0	0	1
61	2	27.3781	2		0	0	unknown	unknown	1	abdominal pain	1	29	0	0	0	0	0	0	0	0	1	1	0	0	0	0	0	0	0	0	0	0	2	4	8	2	0	0	0	0	0	0	0	0	1	0	0	1	0
62	2	28.7836	0		0	1	abcès fesse	abcès fesse	1	abces	1	0.5	1	0	0	0	0	0	0	0	0	1	0	0	1	0	0	0	0	0	0	0	2	0	3	2	0	1	0	0	0	0	0	0	1	1	0	0	2
63	2	51.589	2		0	0	crise d'épilepsie	crise d'épilepsie	0	epileptic fit	1	29	0	0	0	0	0	0	0	0	1	0	0	0	1	0	0	0	0	0	0	0	2	1	1	2	0	1	0	0	0	0	0	0	1	1	0	0	1
64	2	41.9726	0		1	1	unknown	unknown	1	abdominal pain	1	365	0	0	0	1	0	0	1	0	0	0	0	0	0	0	1	1	0	0	0	0	2	4	1	0	0	0	0	0	0	0	0	0	0	0	0	1	0
65	1	44.8959	1		0	0	unknown	unknown	1	arthralgia	1	7	0	0	0	1	0	0	1	0	0	0	0	0	0	0	0	0	0	0	0	1	0	0	0	2	0	0	0	0	0	0	0	0	1	0	0	1	0
66	1	19.4055	0		0	1	unknown	unknown	1	road traffic accident	1	365	1	0	0	0	0	0	1	0	0	0	0	0	0	0	0	1	0	0	0	0	0	0	0	0	0	0	0	0	0	0	0	0	5	0	0	1	0
67	1	23.5616	0		0	0	rien	rien	1	abdominal pain	1	365	1	0	0	0	0	0	0	0	1	1	1	0	1	0	0	0	0	0	0	0	2	3	8	1	0	1	0	0	0	0	0	0	1	0	0	0	2
68	2	36.7041	1		0	0	unknown	unknown	1	back pain	1	366	0	0	0	1	1	0	1	0	0	0	0	0	0	0	0	1	0	0	0	1	2	4	8	2	2	1	0	0	0	0	0	0	3	0	0	1	0
69	2	59.6877	0		1	0	unknown	unknown	1	abdominal pain	1	8	0	0	0	0	0	0	0	0	1	1	0	0	0	0	0	0	0	0	0	0	0	0	0	0	0	0	0	0	0	0	0	0	1	0	0	0	2
70	2	59.8986	0		0	1	unknown	unknown	0	stroke	1	8	1	0	0	0	0	0	0	0	1	1	0	0	0	0	0	0	0	0	0	0	0	0	0	0	0	0	0	0	0	0	0	0	1	0	0	1	0
71	1	26.4959	2		1	1	hypokaliémie	hypokaliémie	0	hypokalaemia	0	0	1	0	0	1	0	0	1	0	0	0	0	0	0	0	0	1	0	0	0	0	1	4	1	1	1	0	0	0	0	0	0	0	1	0	0	1	0
72	1	34.389	2		0	1	unknown	unknown	1	arthralgia	0	0	0	0	0	1	0	0	1	0	0	0	0	0	0	0	0	1	1	0	0	0	0	0	0	0	0	0	0	0	0	0	0	0	0	0	0	1	0
73	2	19.6274	0		1	1	unknown	unknown	1	abdominal pain	1	29	0	0	0	0	0	0	0	0	1	0	0	0	1	0	0	0	0	0	0	0	2	2	1	2	0	1	0	0	0	0	0	0	1	0	0	1	0
74	1	43.4575	3		0	1	élargissement VG	élargissement VG	0	dypsnée	1	8	0	1	1	1	0	0	1	0	0	0	0	0	0	0	0	0	0	0	0	0	0	0	0	2	0	0	0	0	0	0	0	0	1	0	0	1	0
75	2	36.9151	3		0	0	ongle incarné	ongle incarné	1	in-growing toenail	1	29	1	0	0	0	0	0	0	0	1	0	0	0	0	0	0	0	0	0	0	0	1	4	8	2	2	0	0	0	0	0	1	0	2	0	0	1	0
76	2	25.4575	0		0	1	infection orteil	infection orteil	1	infected toe	1	366	1	0	0	0	0	0	0	0	1	1	0	0	1	0	0	0	0	0	0	0	2	4	8	2	0	1	0	0	0	0	0	0	1	0	0	0	2
77	1	41.0493	0		1	0	diverticulite	diverticulite	1	diverticulitis	1	365	1	0	0	0	0	0	0	0	1	1	0	0	1	0	0	0	0	0	0	0	2	2	2	0	0	0	0	0	0	0	0	0	1	0	0	0	1
78	2	26.2137	3		0	1	unknown	unknown	1	lymphadenopathy	0	0	0	0	0	0	0	0	0	0	1	1	0	0	1	0	0	0	0	0	0	0	2	2	1	2	0	1	0	0	0	0	0	0	2	0	0	0	1
79	1	18.0658	3		1	1	unknown	unknown	1	twisted ankle	0	0	0	0	0	0	0	0	0	0	1	1	0	1	1	0	0	0	0	0	0	0	0	0	2	0	0	0	0	0	0	0	0	0	2	0	0	1	0
80	2	29.9288	1		0	1	unknown	unknown	1	trauma	0	0	0	0	0	0	0	0	0	0	1	1	0	0	0	1	0	0	0	0	0	0	2	4	8	2	0	0	0	0	0	0	0	0	1	0	0	1	0
81	2	67.0658	0		0	0	unknown	unknown	1	chest pain	1	29	0	0	0	0	0	0	0	0	1	0	1	0	0	0	0	0	0	0	0	0	1	4	1	2	0	0	0	0	0	0	0	0	1	0	0	0	4
82	2	74.1452	1		0	2	unknown	unknown	1	transient ischaemic attack	1	27	0	0	0	0	0	0	0	0	1	1	0	0	0	0	0	0	0	0	0	0	2	4	1	0	0	0	0	0	0	0	1	0	2	0	0	0	2
83	2	69.2027	0		0	0	anorexie	unknown	0	anorexia	1	0.5	0	0	0	0	0	0	0	0	1	1	0	0	0	0	0	0	0	0	0	0	0	0	0	0	0	0	0	0	0	0	0	0	0	1	0	0	2
84	2	61.5452	0		0	1	colique néphrétique	lithiase rénale	1	renal colic	29	1	0	0	0	0	0	0	0	0	1	0	0	0	0	0	0	0	0	0	0	0	1	3	4	2	0	0	0	0	0	0	0	0	1	1	0	1	0
85	2	43.1342	1		1	0	poussée de maladie de crohn	poussée Crohn	1	Crohn's disease	1	5	1	0	0	0	0	0	0	0	1	0	0	0	1	0	0	0	0	0	0	0	2	3	8	2	0	1	0	0	0	0	0	0	1	1	0	1	0
86	2	23.537	0		0	1	unknown	unknown	1	fall	1	365	0	0	0	0	0	0	0	0	1	0	0	0	0	0	0	0	0	0	0	0	0	0	0	0	0	0	0	0	0	0	0	0	1	0	0	1	0
87	2	20.4082	2		0	1	unknown	unknown	1	abdominal pain	0	0	0	0	0	0	0	0	0	0	0	1	0	0	0	0	0	0	0	0	0	0	1	3	8	2	0	0	0	0	0	0	0	0	1	0	0	0	4
88	2	59.4712	1		0	2	unknown	unknown	1	abdominal pain	1	29	0	0	0	0	0	0	0	0	1	0	0	0	0	0	0	0	0	0	0	0	0	0	0	0	0	0	0	0	0	0	1	0	0	1	0	1	0
89	2	38.7151	1		1	2	unknown	unknown	1	fall	1	28	0	0	0	0	0	0	0	0	1	1	0	0	0	0	0	0	0	0	0	0	1	4	2	2	0	1	0	0	0	0	0	0	1	1	0	0	2
90	2	42.0575	0		1	1	lithiase biliaire	cholélithiase	1	abdominal pain	0	0	1	0	0	0	0	0	0	0	1	0	0	0	0	0	0	0	0	0	0	0	0	0	0	0	0	0	0	0	0	0	0	0	1	0	0	0	2
91	2	54.074	0		0	0	unknown	unknown	1	vertigo	1	2	0	0	0	0	0	0	0	0	1	1	0	0	0	0	0	0	0	0	0	0	2	4	2	0	0	0	0	0	0	0	0	0	1	1	0	0	2
92	2	30.8301	0		1	0	unknown	unknown	1	renal colic	1	29	0	0	0	0	0	0	0	0	1	1	0	0	0	0	0	0	0	0	0	0	1	4	1	0	0	0	0	0	0	0	0	0	1	0	0	1	0
93	2	50.1068	1		0	0	unknown	unknown	1	disc herna	1	1	0	0	0	0	0	0	0	0	1	0	0	0	0	0	0	0	0	0	0	0	0	0	0	2	0	0	0	0	0	0	0	0	1	0	0	0	2
94	2	29.2493	1		0	1	entorse cheville	unknown	1	twisted ankle	1	366	0	0	0	0	0	0	0	0	1	1	0	0	1	0	0	0	0	0	0	0	2	2	3	2	0	1	0	0	0	0	0	0	1	0	0	0	1
95	2	33.5068	0	1	0	0	unknown	unknown	1	fall	1	366	0	0	0	0	0	0	0	0	0	1	0	0	0	0	0	0	0	0	0	0	0	0	2	0	1	0	0	0	0	0	0	0	1	0	0	1	0
96	2	32.0575	1		0	1	unknown	unknown	1	road traffic accident	1	365	0	0	0	1	0	0	1	0	0	0	0	0	0	0	0	1	0	0	0	1	1	4	8	2	0	0	0	0	0	0	0	0	2	0	0	1	0
97	2	45.3863	0	2	1	0	unknown	unknown	1	skin infection	1	366	0	0	0	0	0	0	0	0	1	0	0	0	0	0	0	0	0	0	0	0	2	4	8	2	0	0	0	0	0	0	0	1	1	0	0	0	2
98	2	58.2	0		0	2	unknown	unknown	0	vasculitis	1	1	0	0	0	0	0	0	0	0	1	0	0	0	1	0	0	0	0	0	0	0	2	3	5	2	0	1	0	0	0	0	0	0	1	0	0	0	2
99	2	22.3836	0		0	1	unknown	unknown	1	trauma	1	29	0	0	0	0	0	0	0	0	1	1	0	0	0	0	0	0	0	0	0	0	0	0	0	0	0	0	0	0	0	0	0	0	1	0	0	1	0
100	2	22.8603	0	1	0	1	unknown	unknown	1	trauma	1	29	0	0	0	0	0	0	0	0	1	0	0	0	0	0	0	0	0	0	0	0	0	0	0	0	0	0	0	0	0	0	1	0	2	0	0	1	0
[truncated: 12 more columns]

## Sheet: Qmédecin
N°	Study investigator	1.1	1.1 additional info	1.2	1.3	1.4	1.5	1.6	2.1	2.2.1	2.2.2	2.2.3	2.2.4	2.2.5	2.2.6	2.2.7	2.2.8	2.2.9	2.2.10	2.3.1	2.3.2	2.3.3	2.4	2.5.1	2.5.2	2.5.3	2.5.4	2.5.5	2.5.6	2.5.7	2.6	2.7.1	2.7.2	2.7.3	2.7.4	2.7.5	2.7.6	2.7.7	3.1	3.2	3.3	3.4	3.5	3.6	3.7	3.8	3.9	3.10	3.11
1	1	0		1	0	4	2	5	0	0	0	1	0	0	0	0	0	0	0	0	0	0	0	0	0	0	0	0	1	0	1	0	0	0	0	0	0	0	0	0	0	0	0	0	0	0	0	0	0
2	1	0		1	0	2	1	5	0	0	0	0	1	0	0	0	0	0	0	0	0	0	0	0	0	0	0	0	0	0	1	0	0	0	0	0	0	0	0	0	0	0	0	0	0	0	0	0	0
3	1	0		1	1	3	2	5	0	0	0	0	1	0	0	0	0	0	0	0	0	0	0	0	0	0	0	0	0	0	1	0	0	0	0	0	0	0	0	0	0	0	0	0	0	0	0	0	0
4	1	0		1	0	1	0	1	1	0	0	0	0	0	0	0	0	0	0	1	0	0	0	1	0	0	0	0	0	1	0	0	0	0	0	1	1	0	0	0	0	0	0	1	0	0	0	0	0
5	1	0	1	0	2	35	7	5	1	0	0	0	0	0	0	0	0	0	0	0	0	1	1	0	0	0	0	0	0	0	0	0	0	0	0	0	1	0	0	0	0	0	0	0	0	0	0	0	0
6	1	0	1	0	2	35	7	5	1	0	0	0	0	0	0	0	0	0	0	1	1	0	1	0	0	0	0	0	0	0	0	0	1	0	0	0	0	0	0	0	0	0	0	0	0	0	0	0	0
7	1	0	1	0	2	35	7	5	1	0	0	0	0	0	0	0	0	0	0	1	1	0	1	0	0	0	0	0	0	0	0	0	0	0	0	1	0	0	0	0	0	0	0	0	0	0	0	0	0
8	1	1		1	0	0.25	0.25	4	0	0	0	0	1	1	0	1	0	0	0	0	0	0	0	0	0	0	0	0	0	0	1	0	0	0	0	0	0	0	0	0	0	0	0	0	0	0	0	0	0
9	1	1		0	0	3	3	5	0	0	1	1	1	0	0	0	0	1	0	0	0	0	0	0	0	0	0	0	0	0	1	0	0	0	0	0	0	0	0	0	0	0	0	0	0	0	0	0	0
10	1	1		0	0	3	3	5	0	0	1	1	1	0	0	0	0	1	0	0	0	0	0	0	0	0	0	0	0	0	1	0	0	0	0	0	0	0	0	0	0	0	0	0	0	0	0	0	0
11	1	1		1	0	0.25	0.25	4	0	0	0	0	1	1	0	1	0	1	0	0	0	0	0	0	0	0	0	0	0	0	1	0	0	0	0	0	0	0	0	0	0	0	0	0	0	0	0	0	0
12	2	1		1	0	0.33	0.33	2	0	0	0	0	1	0	0	0	0	0	0	0	0	0	0	0	0	0	0	0	0	0	1	0	0	0	0	0	0	0	0	0	0	0	0	0	0	0	0	0	0
13	1	0		0	0	3	1	2	0	0	0	1	1	0	0	0	0	0	0	0	0	0	0	0	0	0	0	0	0	0	2	0	0	0	0	0	0	0	0	0	0	0	0	0	0	0	0	0	0
14	2	0		0	0	3	1	2	0	0	0	1	0	1	0	0	0	0	0	0	0	0	0	0	0	0	0	0	0	0	2	0	0	0	0	0	0	0	0	0	0	0	0	0	0	0	0	0	0
15	2	0	1	1	0	4	1.5	5	0	0	1	1	1	1	0	0	0	1	0	0	0	0	0	0	0	0	0	0	0	0	1	0	0	0	0	0	0	0	0	0	0	0	0	0	0	0	0	0	0
16	1	0		0	0	0.33	0.33	5	1	0	0	0	0	0	0	0	0	0	0	1	0	0	1	0	0	0	0	0	0	0	0	0	0	0	0	0	1	0	0	0	0	0	0	0	0	0	0	0	0
17	1	0		0	0	0.33	0.33	5	0	0	0	0	0	0	0	0	0	1	0	0	0	0	0	0	0	0	0	0	0	0	1	0	0	0	0	0	0	0	0	0	0	0	0	0	0	0	0	0	0
18	1	0		0	0	0.25	0.25	5	0	0	0	0	0	0	0	0	0	1	0	0	0	0	0	0	0	0	0	0	0	0	1	0	0	0	0	0	0	0	0	0	0	0	0	0	0	0	0	0	0
19	1	0		0	0	0.25	0.25	5	1	0	0	0	0	0	0	0	0	0	0	1	0	1	0	0	0	0	0	0	0	1	0	0	0	0	0	0	0	1	0	0	0	0	0	0	0	1	0	0	0
20	1	0		1	0	3	1.5	4	0	0	0	1	1	0	0	0	0	0	0	0	0	0	0	0	0	0	0	0	0	0	2	0	0	0	0	0	0	0	0	0	0	0	0	0	0	0	0	0	0
21	1	0		1	0	3	1.5	4	0	0	1	0	1	0	0	0	0	0	0	0	0	0	0	0	0	0	0	0	0	0	2	0	0	0	0	0	0	0	0	0	0	0	0	0	0	0	0	0	0
22	1	0		1	1	20	2	5	0	0	0	0	0	0	0	0	0	0	1	0	0	0	0	0	0	0	0	0	0	0	1	0	0	0	0	0	0	0	0	0	0	0	0	0	0	0	0	0	0
23	1	0		1	1	20	2	5	0	0	0	1	0	0	0	0	0	0	0	0	0	0	0	0	0	0	0	0	0	0	1	0	0	0	0	0	0	0	0	0	0	0	0	0	0	0	0	0	0
24	1	0		1	1	20	2	5	0	0	0	1	0	0	0	0	0	0	0	0	0	0	0	0	0	0	0	0	0	0	0	0	0	0	0	0	0	1	0	0	0	0	0	0	0	0	0	0	0
25	1	0		0	0	8	4	5	0	0	0	1	1	1	0	0	0	0	0	0	0	0	0	0	0	0	0	0	0	0	0	0	1	0	0	0	0	0	0	0	0	0	0	0	1	1	0	0	0
26	1	0		1	0	4	1	2	0	0	0	1	0	0	1	0	0	0	0	0	0	0	0	0	0	0	0	0	0	0	1	0	0	0	0	0	0	0	0	0	0	0	0	0	0	0	0	0	0
27	1	0		1	0	4	1	2	0	0	0	1	0	0	0	0	0	0	0	0	0	0	0	0	0	0	0	0	0	0	1	0	0	0	0	0	0	0	0	0	0	0	0	0	0	0	0	0	0
28	2	1		0	0	3	1	4	0	0	1	0	1	0	0	0	0	0	0	0	0	0	0	0	0	0	0	0	0	0	1	0	0	0	0	0	0	0	0	0	0	0	0	0	0	0	0	0	0
29	2	1		0	0	3	1	4	0	0	1	0	1	0	0	0	0	0	0	0	0	0	0	0	0	0	0	0	0	0	1	0	0	0	0	0	0	0	0	0	0	0	0	0	0	0	0	0	0
30	2	1		0	0	3	1	4	0	0	0	0	0	0	0	0	0	0	1	0	0	0	0	0	0	0	0	0	0	0	0	0	0	0	0	1	1	0	0	0	0	0	1	0	1	0	0	0	0
31	1	0	1	0	0	20	2	5	1	0	0	0	0	0	0	0	0	0	0	0	1	0	1	0	0	0	0	0	0	0	0	0	1	0	0	1	1	0	0	0	0	0	0	0	0	0	0	0	0
32	1	1		0	0	4	1	4	0	0	1	0	1	0	0	0	0	0	0	0	0	0	0	0	0	0	0	0	0	0	1	0	0	0	0	0	0	0	0	0	0	0	0	0	0	0	0	0	0
33	1	1		0	0	4	1	4	0	0	0	0	1	0	0	0	0	0	0	0	0	0	0	0	0	0	0	0	0	0	1	0	0	0	0	0	0	0	0	0	0	0	0	0	0	0	0	0	0
34	2	0		1	0	4	1	2	0	0	0	0	0	0	0	0	0	0	1	0	0	0	0	0	0	0	0	0	0	0	0	0	0	1	0	0	0	0	0	0	0	0	0	0	0	0	0	0	0
35	2	0		1	0	4	1	2	0	0	1	0	0	0	0	0	0	0	0	0	0	0	0	0	0	0	0	0	0	0	1	0	0	0	0	0	0	0	0	0	0	0	0	0	0	0	0	0	0
36	2	0		1	0	3	1.5	4	0	0	0	1	1	0	0	0	0	0	0	0	0	0	0	0	0	0	0	0	0	0	2	0	0	0	0	0	0	0	0	0	0	0	0	0	0	0	0	0	0
37	2	0		1	0	4	2	5	0	0	0	0	1	0	0	0	0	1	0	0	0	0	0	0	0	0	0	0	0	0	1	0	0	0	0	0	0	0	0	0	0	0	0	0	0	0	0	0	0
38	2	1		1	0	0.25	0.25	2	0	0	1	0	1	0	0	0	0	0	0	0	0	0	0	0	0	0	0	0	0	0	1	0	0	0	0	0	0	0	0	0	0	0	0	0	0	0	0	0	0
39	2	1		1	0	0.25	0.25	2	0	0	1	0	1	0	0	0	0	0	0	0	0	0	0	0	0	0	0	0	0	0	1	0	0	0	0	0	0	0	0	0	0	0	0	0	0	0	0	0	0
40	2	1		1	0	0.25	0.25	2	0	0	1	0	1	0	0	0	0	0	0	0	0	0	0	0	0	0	0	0	0	0	1	0	0	0	0	0	0	0	0	0	0	0	0	0	0	0	0	0	0
41	2	1		1	0	0.25	0.25	2	0	0	1	0	1	0	0	0	0	0	0	0	0	0	0	0	0	0	0	0	0	0	1	0	0	0	0	0	0	0	0	0	0	0	0	0	0	0	0	0	0
42	2	0		0	0	1	1	5	0	0	1	0	1	0	0	0	0	0	0	0	0	0	0	0	0	0	0	0	0	0	1	0	0	0	0	0	0	0	0	0	0	0	0	0	0	0	0	0	0
43	2	0		0	0	1	1	5	0	0	1	0	0	0	0	0	0	1	0	0	0	0	0	0	0	0	0	0	0	0	1	0	0	0	0	0	0	0	0	0	0	0	0	0	0	0	0	0	0
44	2	1		1	0	4	1	5	0	0	0	1	0	1	0	0	0	0	0	0	0	0	0	0	0	0	0	0	0	0	0	0	0	0	0	0	0	1	0	0	0	0	0	0	0	0	0	0	0
45	2	0		0	0	3	2	3	0	0	0	1	1	1	0	0	0	1	0	0	0	0	0	0	0	0	0	0	0	0	1	0	0	0	0	0	0	0	0	0	0	0	0	0	0	0	0	0	0
46	2	0		0	0	3	2	3	0	0	0	1	1	0	0	0	0	1	0	0	0	0	0	0	0	0	0	0	0	0	1	0	0	0	0	0	0	0	0	0	0	0	0	0	0	0	0	0	0
47	2	0		0	0	3	2	3	0	0	0	0	1	1	0	0	0	1	0	0	0	0	0	0	0	0	0	0	0	0	1	0	0	0	0	0	0	0	0	0	0	0	0	0	0	0	0	0	0
48	2	0		0	0	3	2	3	0	0	0	1	1	1	0	0	0	1	0	0	0	0	0	0	0	0	0	0	0	0	1	0	0	0	0	0	0	0	0	0	0	0	0	0	0	0	0	0	0
49	2	1		0	0	1	1	5	0	0	0	0	1	1	0	0	0	0	0	0	0	0	0	0	0	0	0	0	0	0	2	0	0	0	0	0	0	0	0	0	0	0	0	0	0	0	0	0	0
50	2	0		1	0	4	1	2	0	0	0	1	1	1	0	0	0	0	0	0	0	0	0	0	0	0	0	0	0	0	1	0	0	0	0	0	0	0	0	0	0	0	0	0	0	0	0	0	0
51	2	0		1	0	4	1	2	0	0	0	0	0	0	0	0	0	0	1	0	0	0	0	0	0	0	0	0	0	0	0	0	0	0	0	0	1	0	0	0	0	0	0	0	0	0	0	0	0
52	2	0		1	0	4	2	5	0	0	0	0	1	0	0	0	0	0	0	0	0	0	0	0	0	0	0	0	0	0	1	0	0	0	0	0	0	0	0	0	0	0	0	0	0	0	0	0	0
53	2	0		1	0	2	0.25	5	0	0	0	0	1	0	0	0	0	0	0	0	0	0	0	0	0	0	0	0	0	0	2	0	0	0	0	0	0	0	0	0	0	0	0	0	0	0	0	0	0
54	2	0		1	0	2	0.25	5	0	0	0	0	1	0	0	0	0	0	0	0	0	0	0	0	0	0	0	0	0	0	1	0	0	0	0	0	0	0	0	0	0	0	0	0	0	0	0	0	0
55	2	0		0	0	0	0	5	0	0	0	0	1	1	0	0	0	1	0		0	0	0	0	0	0	0	0	0	0	1	0	0	0	0	0	0	0	0	0	0	0	0	0	0	0	0	0	0
56	1	1		0	0	2	0.33	5	0	0	1	1	1	0	0	0	0	0	0	0	0	0	0	0	0	0	0	0	0	0	1	0	0	0	0	0	0	0	0	0	0	0	0	0	0	0	0	0	0
57	2	1		1	0	0	0.16	2	0	0	0	1	1	0	0	0	0	0	0	0	0	0	0	0	0	0	0	0	0	0	1	0	0	0	0	0	0	0	0	0	0	0	0	0	0	0	0	0	0
58	1	unknown		0	0	unknown	unknown	unknown	0	0	0	0	0	0	0	0	0	1	0	0	0	0	0	0	0	0	0	0	0	0	1	0	0	0	0	0	0	0	0	0	0	0	0	0	0	0	0	0	0
59	1	unknown		0	0	unknown	unknown	unknown	0	0	0	0	0	0	0	0	0	1	0	0	0	0	0	0	0	0	0	0	0	0	1	0	0	0	0	0	0	0	0	0	0	0	0	0	0	0	0	0	0
60	2	1		1	0	3	1.5	5	0	0	0	0	0	0	0	0	0	1	0	0	0	0	0	0	0	0	0	0	0	0	1	0	0	0	0	0	0	0	0	0	0	0	0	0	0	0	0	0	0
61	2	1		1	0	3	1.5	5	0	0	0	0	1	0	0	0	0	0	0	0	0	0	0	0	0	0	0	0	0	0	2	0	0	0	0	0	0	0	0	0	0	0	0	0	0	0	0	0	0
62	2	1		1	0	3	1.5	5	0	0	0	0	1	0	0	0	0	0	0	0	0	0	0	0	0	0	0	0	0	0	2	0	0	0	0	0	0	0	0	0	0	0	0	0	0	0	0	0	0
63	2	0		1	0	4	0.5	5	0	0	0	0	0	1	0	0	0	0	1	0	0	0	0	0	0	0	0	0	0	0	0	0	1	0	0	0	1	0	0	1	1	0	0	0	0	0	1	0	0
64	2	0		1	0	3	0.5	2	0	0	0	1	0	0	0	1	0	1	0	0	0	0	0	0	0	0	0	0	0	0	2	0	0	0	0	0	0	0	0	0	0	0	0	0	0	0	0	0	0
65	1	0		1	0	1.5	0	1	0	0	1	1	1	1	0	0	0	0	0	0	0	0	0	0	0	0	0	0	0	0	1	0	0	0	0	0	0	0	0	0	0	0	0	0	0	0	0	0	0
66	1	0		0	0	3	0.75	3	0	0	0	1	1	1	0	0	0	1	0	0	0	0	0	0	0	0	0	0	0	0	1	0	0	0	0	0	0	0	0	0	0	0	0	0	0	0	0	0	0
67	1	0		1	0	2	1	5	0	0	1	1	1	0	0	0	0	0	0	0	0	0	0	0	0	0	0	0	0	0	0	0	0	0	0	0	0	1	0	0	0	0	0	0	1	1	0	1	0
68	2	0		0	0	0	0.08	5	0	0	1	1	1	0	0	0	0	0	0	0	0	0	0	0	0	0	0	0	0	0	1	0	0	0	0	0	0	0	0	0	0	0	0	0	0	0	0	0	0
69	2	0		0	0	3	0.75	3	0	0	1	1	1	0	0	0	1	1	0	0	0	0	0	0	0	0	0	0	0	0	1	0	0	0	0	0	0	0	0	0	0	0	0	0	0	0	0	0	0
70	2	0		1	0	2	0	1	0	0	0	1	0	0	0	0	0	0	0	0	0	0	0	0	1	0	0	0	0	0	1	0	0	0	0	0	0	0	0	0	0	0	0	0	0	0	0	0	0
71	1	1		1	0	2	0	1	0	0	0	0	0	0	0	0	0	1	0	0	0	0	0	0	0	0	0	0	0	0	1	0	0	0	0	0	0	0	0	0	0	0	0	0	0	0	0	0	0
72	1	1		0	0	5	0.5	5	0	0	0	1	0	0	0	0	0	0	0	0	0	0	0	0	0	0	0	0	0	0	2	0	0	0	0	0	0	0	0	0	0	0	0	0	0	0	0	0	0
73	2	0		0	0	0	0	5	0	0	0	1	0	0	0	0	0	0	0	0	0	0	0	0	0	0	0	0	0	0	0	0	0	0	0	0	0	1	0	0	0	0	0	0	0	1	0	0	0
74	1	0		1	0	1	0.08	5	1	0	0	0	0	0	0	0	0	0	0	0	0	1	1	0	0	0	0	0	0	0	2	0	0	0	0	0	0	0	0	0	0	0	0	0	0	0	0	0	0
75	2	1		1	0	3	1	5	0	0	0	0	1	0	0	0	0	0	0	0	0	0	0	0	0	0	0	0	0	0	2	0	0	0	0	0	0	0	0	0	0	0	0	0	0	0	0	0	0
76	2	1		1	0	3	1	5	0	0	0	0	1	0	0	0	0	0	0	0	0	0	0	0	0	0	0	0	0	0	2	0	0	0	0	0	0	0	0	0	0	0	0	0	0	0	0	0	0
77	1	0		1	0	0	0.08	2	0	1	0	0	1	0	0	0	0	0	0	0	0	0	0	0	0	0	0	0	0	0	1	0	0	0	0	0	0	0	0	0	0	0	0	0	0	0	0	0	0
78	2	0		1	0	4	1	2	0	0	0	1	0	0	0	0	0	0	0	0	0	0	0	0	0	0	0	0	0	0	0	0	0	1	0	0	0	1	0	0	0	0	0	1	0	0	0	0	0
79	1	1		1	0	5	3	5	0	0	0	0	1	0	0	0	0	0	0	0	0	0	0	0	0	0	0	0	0	0	1	0	0	0	0	0	0	0	0	0	0	0	0	0	0	0	0	0	0
80	2	?		?	?	?	?	?	0	0	1	1	1	0	0	0	0	1	0	0	0	0	0	0	0	0	0	0	0	0	1	0	0	0	0	0	0	0	0	0	0	0	0	0	0	0	0	0	0
81	2	0		1	0	1	0.33	1	0	0	1	1	1	1	0	0	0	1	0	0	0	0	0	0	0	0	0	0	0	0	1	0	0	0	0	0	0	0	0	0	0	0	0	0	0	0	0	0	0
82	2	0		1	0	1	0.33	1	0	0	1	1	1	1	0	0	0	1	0	0	0	0	0	0	0	0	0	0	0	0	1	0	0	0	0	0	0	0	0	0	0	0	0	0	0	0	0	0	0
83	2	0		0	0	1	1	5	0	0	1	1	1	1	0	0	0	0	0	0	0	0	0	0	0	0	0	0	0	0	1	0	0	0	0	0	0	0	0	0	0	0	0	0	0	0	0	0	0
84	2	0		0	0	3.5	0.5	1	0	0	0	0	1	0	0	0	0	0	0	0	0	0	0	0	0	0	0	0	0	0	1	0	0	0	0	0	0	0	0	0	0	0	0	0	0	0	0	0	0
85	2	0		0	0	3.5	0.5	2	0	1	0	0	1	0	0	0	0	0	0	0	0	0	0	0	0	0	0	0	0	0	0	0	0	0	0	0	0	1	0	0	0	0	0	1	0	1	0	0	0
86	2	0		0	0	3.5	0.5	2	0	0	0	0	1	1	0	0	0	0	0	0	0	0	0	0	0	0	0	0	0	0	0	0	0	0	0	0	0	1	0	0	0	0	0	0	0	0	0	0	0
87	2	1		1	0	2	0	5	0	0	0	0	1	0	0	0	0	0	0	0	0	0	0	0	0	0	0	0	0	0	1	0	0	0	0	0	0	0	0	0	0	0	0	0	0	0	0	0	0
88	2	1		1	0	2	0	5	0	0	0	0	1	0	0	0	0	0	0	0	0	0	0	0	0	0	0	0	0	0	1	0	0	0	0	0	0	0	0	0	0	0	0	0	0	0	0	0	0
89	2	1		1	0	3	0	5	0	0	0	0	1	0	0	0	0	0	0	0	0	0	0	0	0	0	0	0	0	0	1	0	0	0	0	0	0	0	0	0	0	0	0	0	0	0	0	0	0
90	2	0		0	3	1	0	1	0	0	1	1	1	0	0	0	0	0	0	0	0	0	0	0	0	0	0	0	0	0	1	0	0	0	0	0	0	0	0	0	0	0	0	0	0	0	0	0	0
91	2	0		0	0	1	0.12	1	0	0	0	1	1	0	0	0	0	0	0	0	0	0	0	0	0	0	0	0	0	0	1	0	0	0	0	0	0	0	0	0	0	0	0	0	0	0	0	0	0
92	2	5		1	0	2	0	5	0	0	0	0	1	0	0	0	0	0	0	0	0	0	0	0	0	0	0	0	0	0	1	0	0	0	0	0	0	0	0	0	0	0	0	0	0	0	0	0	0
93	2	5		1	0	2	0	5	0	0	0	0	1	0	0	0	0	0	0	0	0	0	0	0	0	0	0	0	0	0	1	0	0	0	0	0	0	0	0	0	0	0	0	0	0	0	0	0	0
94	2	5		1	0	2	0	5	0	0	0	0	1	0	0	0	0	0	0	0	0	0	0	0	0	0	0	0	0	0	1	0	0	0	0	0	0	0	0	0	0	0	0	0	0	0	0	0	0
95	2	1		0	0	3	0	5	0	0	1	1	0	1	0	0	0	0	0	0	0	0	0	0	0	0	0	0	0	0	1	0	0	0	0	0	0	0	0	0	0	0	0	0	0	0	0	0	0
96	2	0		0	0	3.5	0.5	2	0	0	0	0	1	0	0	0	0	0	0	0	0	0	0	0	0	0	0	0	0	0	0	0	0	0	0	0	0	1	0	0	0	0	0	0	0	1	0	0	0
97	2	0		0	0	9	1	5	1	0	0	0	0	0	0	0	0	0	0	0	0	0	0	0	0	0	0	0	0	7	1	0	0	0	0	0	0	0	0	0	0	0	0	0	0	0	0	0	0
98	2	0		0	0	1	1	5	0	0	1	1	1	1	0	0	0	1	0	0	0	0	0	0	0	0	0	0	0	0	1	0	0	0		0	0	0	0	0	0	0	0	0	0	0	0	0	0
99	2	0		0	0	9	1	5	0	0	0	0	1	0	0	0	0	0	0	0	0	0	0	0	0	0	0	0	0	0	1	0	0	0	0	0	0	0	0	0	0	0	0	0	0	0	0	0	0
100	2	0		0	0	2.5	1	1	0	0	0	1	1	0	0	0	0	0	0	0	0	0	0	0	0	0	0	0	0	0	1	0	0	0	0	0	0	0	0	0	0	0	0	0	0	0	0	0	0
[truncated: 3 more columns]
